# Supplementary material for: Human Kidney‐Derived Cells Ameliorate Acute Kidney Injury Without Engrafting into Renal Tissue
Source: PubMed Central journal article supplement (PMC5442715; doi:10.1002/sctm.16-0352), 2017-04-04
Supplement: SCT3-6-1373-s002.pdf [file SCT3-6-1373-s002.pdf]

# Supplemental Figure 2

## A Expansion of CD133<sup>+</sup> and CD133<sup>-</sup> populations

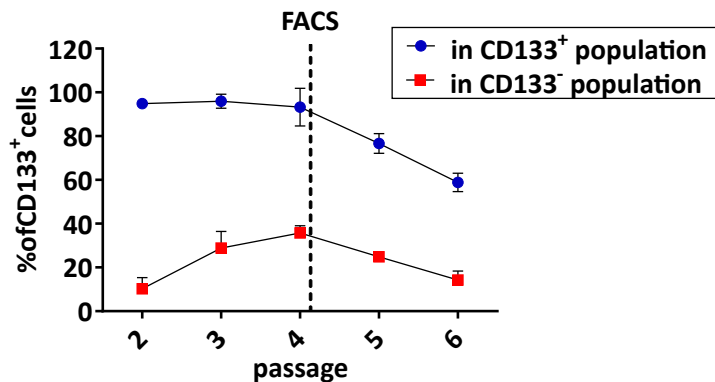

## B p5 CD133<sup>+</sup> CD133<sup>-</sup> hMSCs p3-4

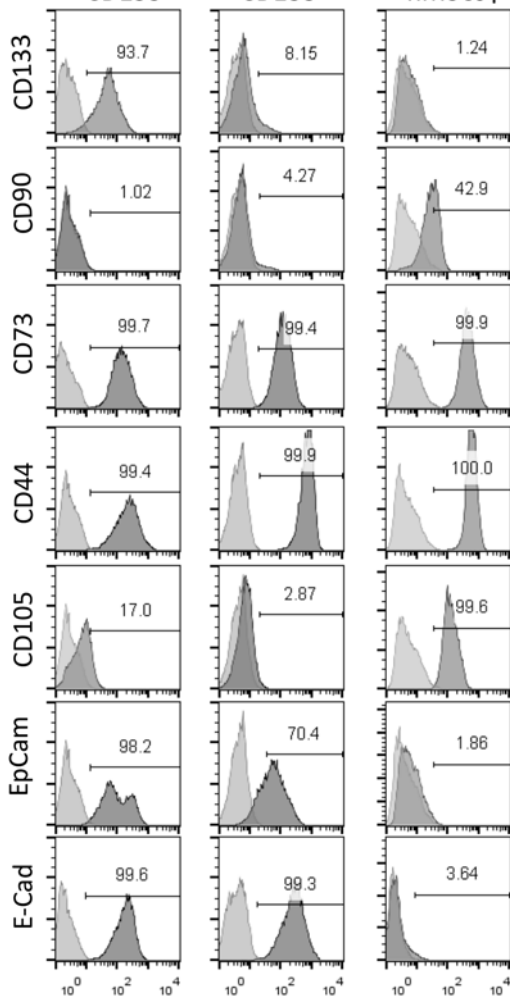

## C

| Marker | CD133 <sup>+</sup> | CD133 <sup>-</sup> | hMSCs         |
|--------|--------------------|--------------------|---------------|
| CD133  | 89 ± 6.65          | 11.63 ± 4.91       | 0.98 ± 0.19   |
| CD90   | 1.175 ± 0.52       | 10.91 ± 9.46       | 14.41 ± 18.35 |
| CD73   | 99.8 ± 0.14        | 99.35 ± 0.49       | 97.56 ± 2.71  |
| CD44   | 99.65 ± 0.35       | 98.65 ± 1.63       | 98.73 ± 1.25  |
| CD105  | 12.425 ± 6.61      | 1.97 ± 1.33        | 89.23 ± 9.3   |
| CD326  | 98.85 ± 1.34       | 67.95 ± 3.46       | 1.24 ± 0.53   |
| CD324  | 99.7 ± 0.14        | 99.3 ± 0.14        | 3.42 ± 1.63   |
