# Supplementary material for: Human Kidney‐Derived Cells Ameliorate Acute Kidney Injury Without Engrafting into Renal Tissue
Source: PubMed Central journal article supplement (PMC5442715; doi:10.1002/sctm.16-0352), 2017-04-04

Cisplatin

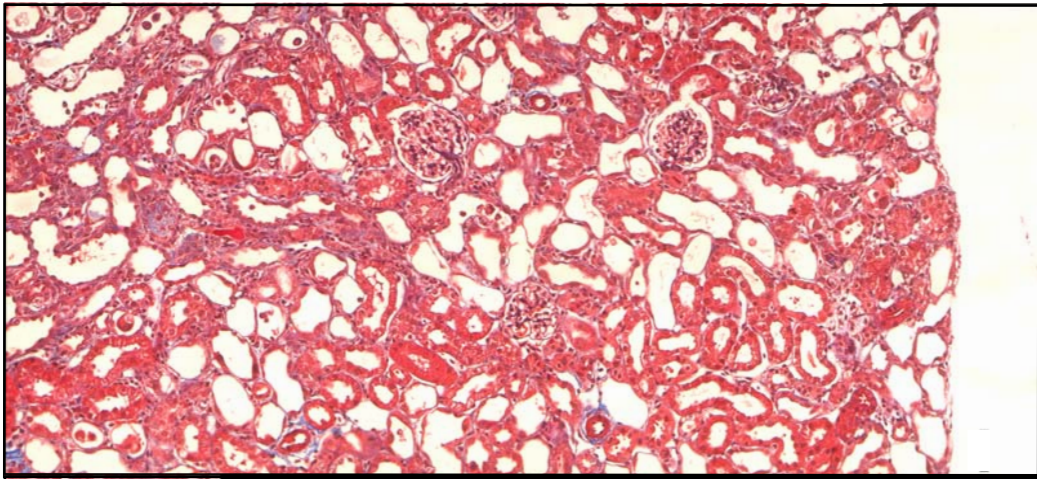

CD133<sup>+</sup>

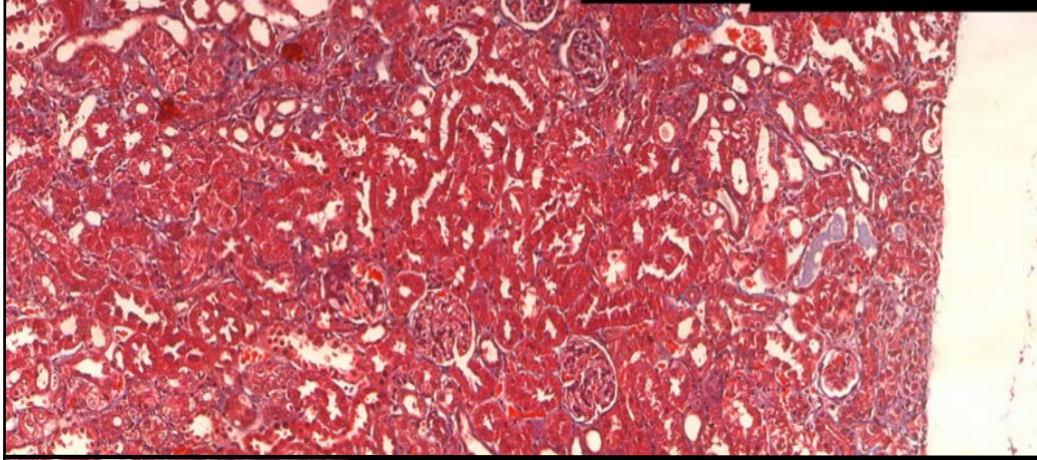

CD133<sup>-</sup>

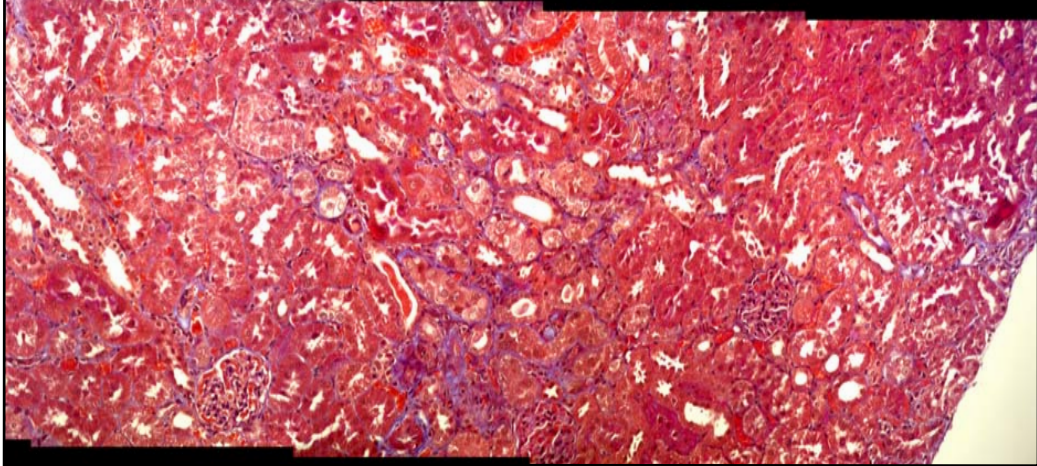

Uninjured

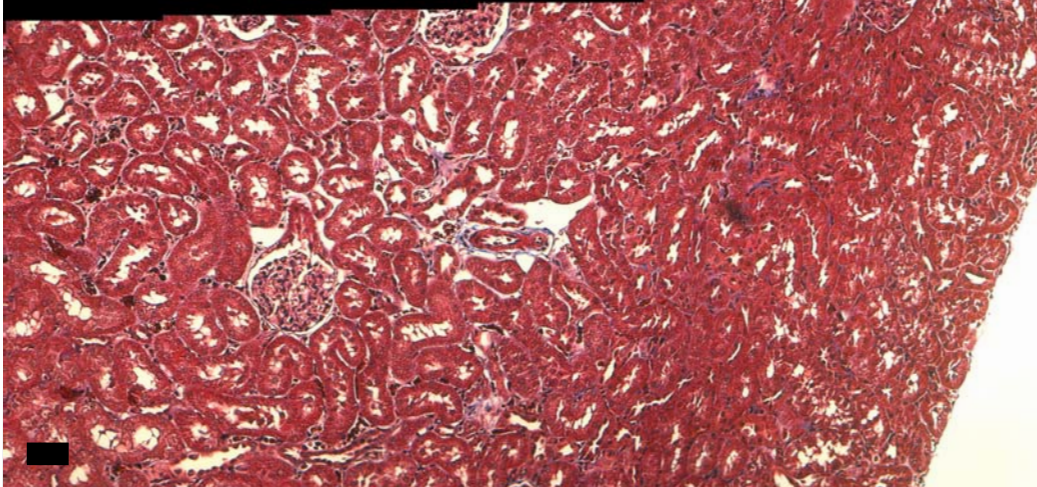

Supplement: SCT3-6-1373-s004.pdf [file SCT3-6-1373-s004.pdf]
